# Supplementary material
Source: PubMed Central journal article supplement (PMC2898302)
Supplement: supp_M109.090845_jbc.M109.090845-1.pdf [file supp_M109.090845_jbc.M109.090845-1.pdf]

### SUPPLEMENTAL FIGURE LEGENDS

**Figure 1. PI and PII state with respect to  $T_a$  and  $T_b$ .** Simultaneous measurement of  $T_b$  and  $VO_2$  of mice treated with 5'-AMP (arrow) in individual metabolic chambers at  $T_a$  of 23°C and 15°C. Data are from the individual mouse shown in Figure 1 plotted at higher resolution. Sampling time is about 8 minutes.

**Figure 2. Deep hypometabolic state of rat and dog.** For both rat and dog, once 5'-AMP has been administered, physical interaction was reduced to a minimum and the animals were kept in a dim light environment until DH was apparent. a) Male Sprague-Dawley rats (~450-550 gw) were injected *i.p* with 0.5mg/gw of 5'-AMP and were placed at 4°C  $T_a$  for approximately 2 h at which point the animals entered DH with  $T_b$  approximately 18°C. Maintained at 15°C  $T_a$ , the rat was able to maintain its  $T_b$  at about 18-20°C. After about 6 h, arousal was induced by gradual rewarming. b) A representative profile of a Beagle mixed breed dog (~5 kg) given freshly prepared 1.5 mg/gw of 5'-AMP via *i.p* and placed initially at 4°C for about 3 h at which point the animal entered DH with  $T_b$  of 22°C. At this stage the animal was transferred and maintained at 18°C  $T_a$  for 8 h. The animal maintained its  $T_b$  at 21-22°C. Arousal was induced by gradually rewarming the animal and the euthermic state was restored after about 8 hours.

**Figure 3. Comparing hypometabolism response of 5'-AMP, adenosine and cAMP.** a)  $VO_2$  measurement of mice given saline, 5'-AMP and adenosine (0.5 ml of 10 mg/ml). b)  $VO_2$  measurement of 5'-AMP and cAMP (0.5mg/gw). c) Higher resolution of the highlighted area in (b) measured at 5 minutes sampling time.

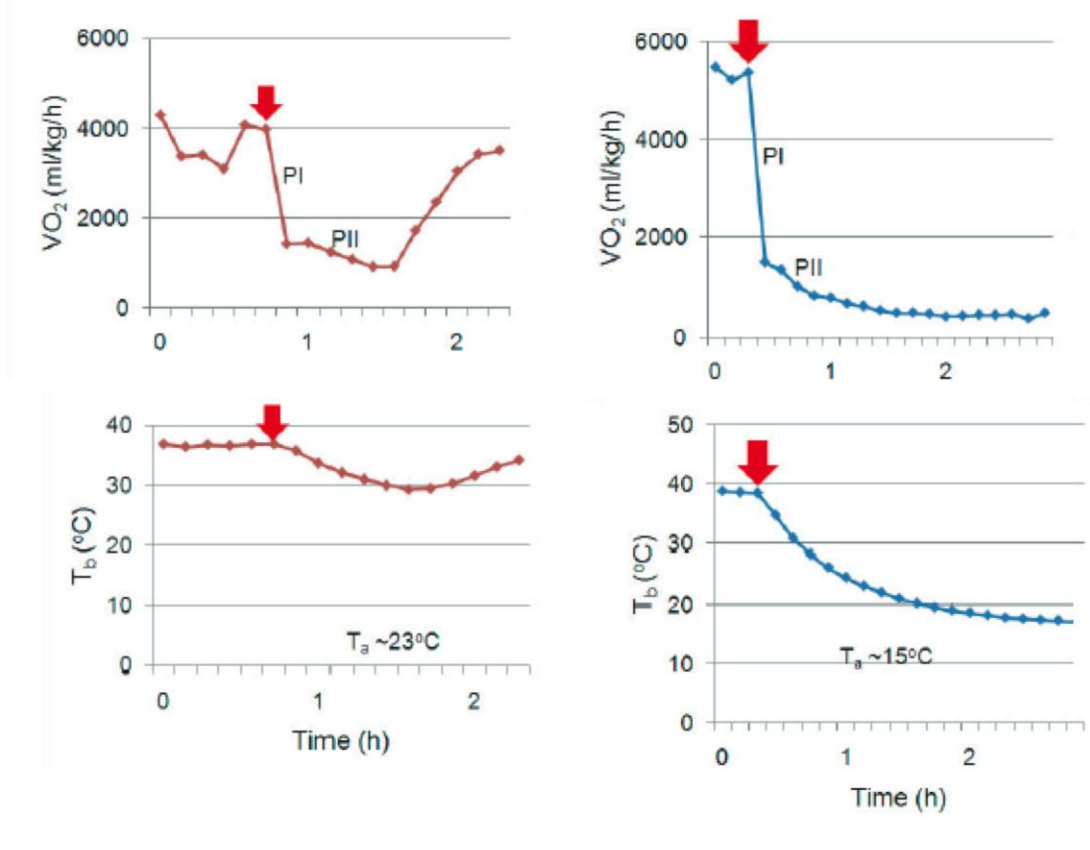

Supplementary Figure 1

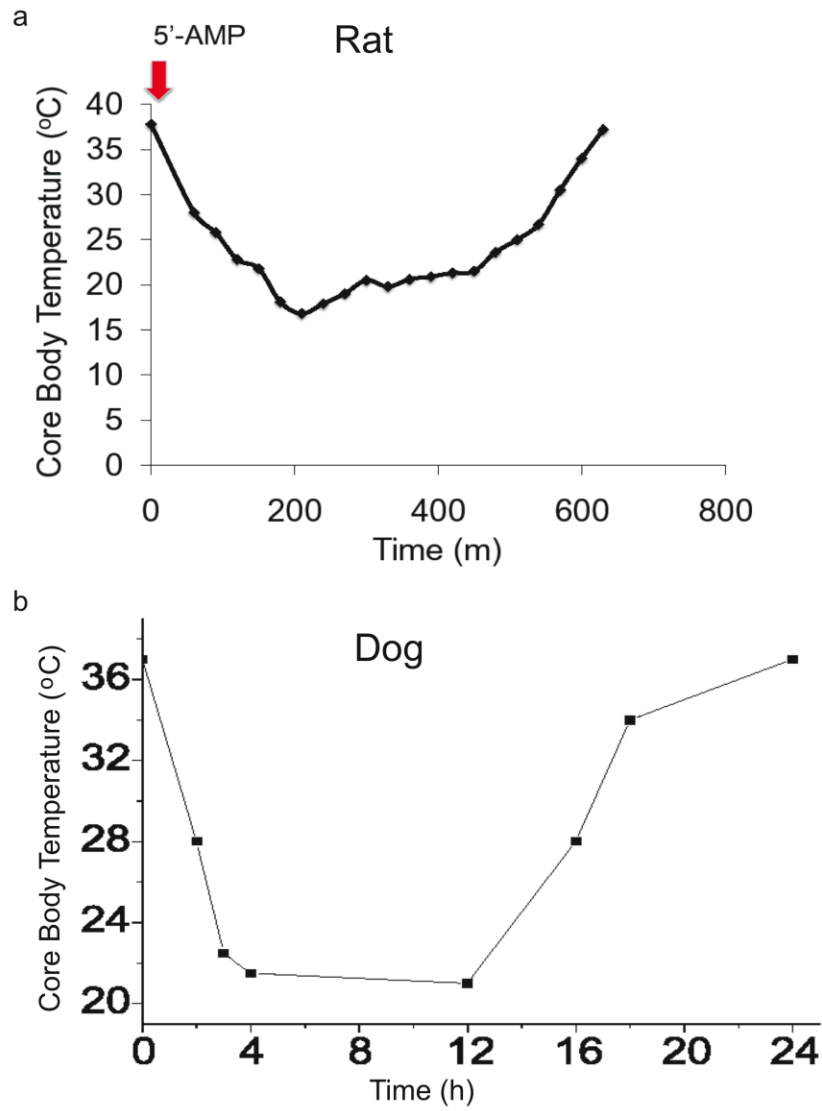

Supplementary Figure 2

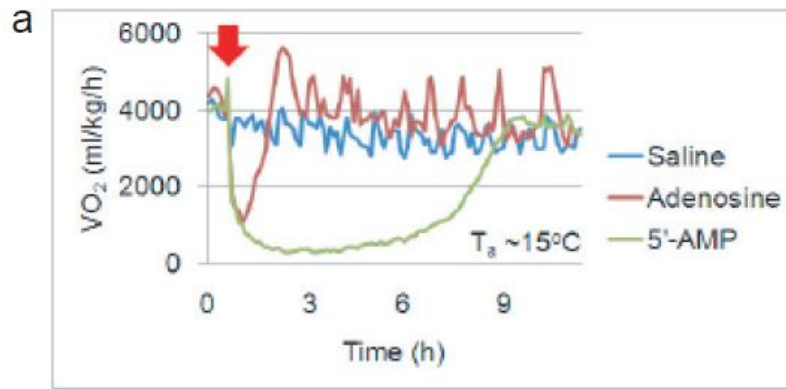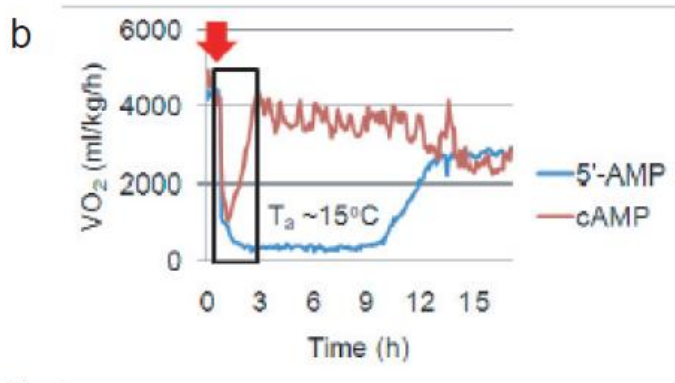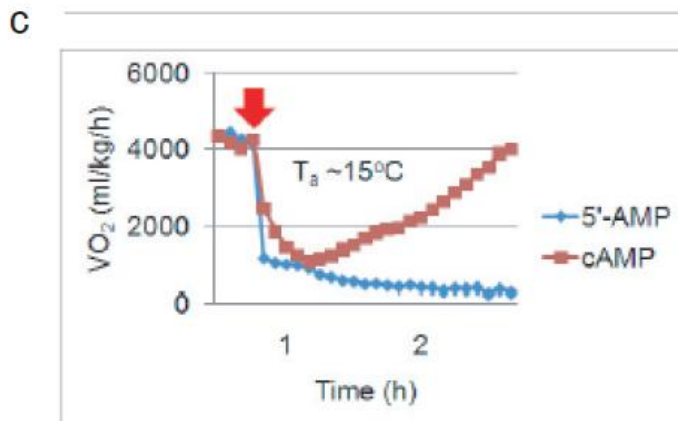

Supplementary figure 3
